# Supplementary material
Source: PubMed Central journal article supplement (PMC6004318)
Supplement: NIHMS973639-supplement-SF1.pdf [file NIHMS973639-supplement-SF1.pdf]

## SUPPLEMENTAL FIGURE 1 LEGEND

**Anti-Gr1 depletion effectively eliminates cisplatin-induced neutrophilia.** (A) Histological scoring of HE staining of the intestinal damage in different groups of treated mice, as determined by two independent observers in a blind manner. No CP, PBS treatment; CP, cisplatin treatment; CPF, cisplatin followed by fecal gavage; CPBG, cisplatin followed by *Ruminococcus gnavus* gavage. Kruskal-Wallis test. \*P<0.05; \*\*P<0.001. (B) Representative quantification of Ly6G<sup>high</sup>CD11b<sup>+</sup> granulocytes in the peripheral blood of tumor-bearing mice 24 hrs after PBS or cisplatin treatment (5 mice/group). (C) Representative staining of Muc3 protein in the ilea of tumor-bearing mice receiving cisplatin in 2 independent experiments (10 mice/group, total). (D) Administration of anti-Gr1 antibodies in the peritoneal cavity of cisplatin-treated tumor-bearing mice abrogates the mobilization of Ly6G<sup>high</sup> cells in peripheral blood.
